# Supplementary material for: Acid-, mechano- and photochromic molecular switches based on a spiropyran derivative for rewritable papers
Source: Royal Society of Chemistry journal article supplement (doi:10.1039/d1qm01637g), 2022-01-01
Supplement: d1qm01637g1.pdf [file d1qm01637g1.pdf]

# Supporting Information

## Acid-, mechano- and photochromic molecular switches based on a spiropyran derivative for rewritable paper

Yuhui Yang, ‡ \* a,b,c# Yilong Chen, ‡ a Yuqing Li, a Zhaohui Wang, a Huimin Zhao a

a College of Materials Science and Engineering, Zhejiang Sci-Tech University, Hangzhou 310018, China

b Department of Polymer Materials, Zhejiang Sci-Tech University, Hangzhou 310018, China

c Institute of Smart Biomedical Materials, Zhejiang Sci-Tech University, Hangzhou 310018, China.

\* Corresponding authors, E-mail address: yhyang@zstu.edu.cn (Y.Y)

### Materials

Rhodamine B (RhB), 1,4-butanediamine, 4-dimethylaminopyridine (DMAP), (1-ethyl-3(3-dimethylpropylamine) carbodiimide (EDCI) and 1-Hydroxybenzotriazole were purchased from Aladdin. 2,3,3-trimethyl-3H-indole, 3-iodopropanoic acid, ultra-dry dichloromethane and 2-hydroxy-5-nitrobenzaldehyde were purchased from J&K Scientific. Solvents were purchased from Hangzhougaojing Chemical Co., Ltd. All the chemicals were used as received without further purification.

### Instruments and methods

<sup>1</sup>H NMR were with a BRUKER AVANCE AV400MHz (<sup>1</sup>H: 400 MHz) spectrometer at room temperature. UV-vis spectra were measured on a spectrometer (solid: UH4150, HITACHI, Japan; liquid: UV1901PC, Aucy Instrument, China). Fluorescence spectra were conducted by using a fluorescence spectrophotometer (solid: F-46001, HITACHI, Japan; liquid: FluoroMax-4, HORIBA Scientific, French) Thermogravimetric analyzer was performed with a PYRIS 1(PerkinElmer, USA). The surface morphology was

tested with a Carl Zeiss SMT Pte Ltd ultra55 (Germany) SEM at an accelerating voltage of 3 kV. Mass spectrometry (MS) was performed with a XEVO-G2STOF (ESI) (Waters, USA). Contact angles were measured on a contact angle measurement instrument (JCY, Shanghai FangRui Instrument Co., Ltd, China). The film was prepared by Spin Coater (KW-4B, Beijing Saidecase Electronics Co. Ltd, China). The UV irradiation (365 nm) was offered by the Portable UV lamp (WFH-204B, Shanghai Chitang Industrial Co., Ltd, China).

## Synthesis

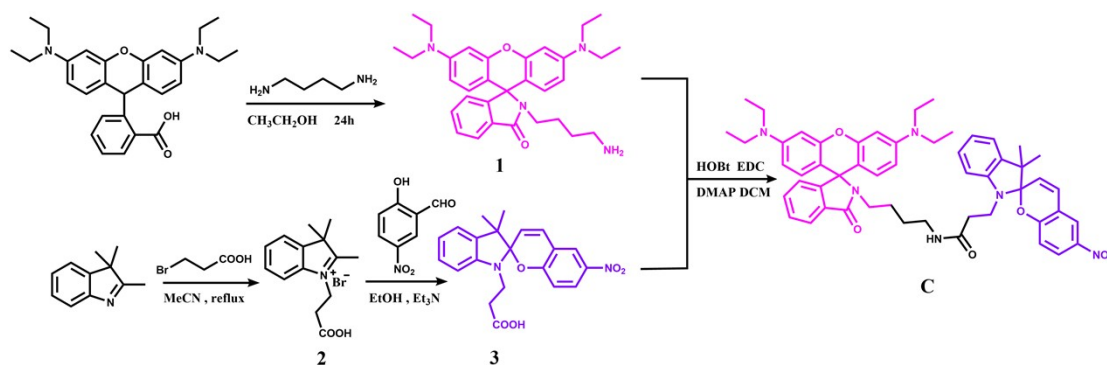

**Scheme 1.** Synthesis of compound C.

### Synthesis of compound 1 (Rh-NH<sub>2</sub>)

To a solution of rhodamine B (1700 mg, 3.13 mmol) in EtOH (30 mL) was added 1,4-Diaminobutane (3.135 mL, 31.3 mmol) over 10 min. The solution was refluxed for 18 h, cooled to room temperature, and the precipitates were filtered and washed with EtOH (3×10 mL). The product was dried in vacuo to give 1.27 g (74.7%).

<sup>1</sup>H NMR (400 MHz, CDCl<sub>3</sub>) δ 7.89 (dt, *J*=7.5, 3.3 Hz, 1H), 7.48–7.40 (m, 2H), 7.12–7.06 (m, 1H), 6.43 (d, *J*=8.8 Hz, 2H), 6.37 (d, *J*=2.5 Hz, 2H), 6.28 (d, *J*=2.6 Hz, 1H), 6.26 (d, *J*=2.6 Hz, 1H), 3.33 (q, *J*=7.1 Hz, 8H), 3.21 (t, *J*=6.2 Hz, 2H), 2.45 (t, *J*=6.2 Hz, 2H), 1.26–1.22 (m, 2H), 1.18 (s, 4H), 1.16 (t, *J*=7.0 Hz, 12H).

ESI-TOF: *m/z* calcd for C<sub>32</sub>H<sub>40</sub>N<sub>4</sub>O<sub>2</sub>, 513.3224 (M+H); found, 513.3226

### Synthesis of compound 2 and 3

They are synthesised according to our previous work.

### Synthesis of compound C

Compound **1** (373 mg, 0.479 mmol), **3** (211 mg, 0.479 mmol), DMAP (66.7 mg, 0.547mmol), EDC (275.47 mg, 1.437 mmol) and catalysts HOBt (32.36 mg, 0.24 mmol) were dissolved in CH<sub>2</sub>Cl<sub>2</sub>(30 mL). The solution was kept stirring for 48 h, and the solvent was evaporated under vacuum. The residue was concentrated and purified by column chromatography (CH<sub>2</sub>Cl<sub>2</sub>: ethyl acetate =1:4, v/v). The product was dried in vacuo to afford 478 mg of **C** (63.3% yield).

<sup>1</sup>H NMR (400 MHz, CDCl<sub>3</sub>) δ 8.10 –7.78(m, 3H), 7.56 (s, 2H), 7.20 – 7.02 (m, 3H), 6.93 – 6.79 (m, 2H), 6.71 (m, 2H), 6.48 – 6.16 (m, 7H), 5.89 (d, *J* = 10.4 Hz, 1H), 3.75 – 3.58 (m, 2H), 3.33 (m, 8H), 3.15–3.08 (m,2H), 3.02– 2.86 (m, 2H), 2.45 (m, 2H), 1.66 (m, 4H), 1.25 (s, 6H), 1.11 (m, 12H).

<sup>13</sup>C NMR (100 MHz, CDCl<sub>3</sub>) δ 171.06, 168.48, 159.61, 153.33, 148.86, 146.61, 141.01, 135.96, 132.56, 131.16, 128.82, 128.27, 127.87, 125.85, 123.89, 122.78, 122.63, 122.21, 121.70, 119.61, 118.78, 115.53, 108.07, 107.04, 106.99, 105.52, 97.76, 60.45, 52.92, 44.42, 40.23, 39.20, 35.88, 29.75, 26.11, 25.84, 25.30, 22.71, 19.83, 14.25, 14.18, 12.62.

ESI-TOF: *m/z* calcd for C<sub>53</sub>H<sub>58</sub>N<sub>6</sub>O<sub>6</sub>, 875.4491(M+H); found, 875.4474

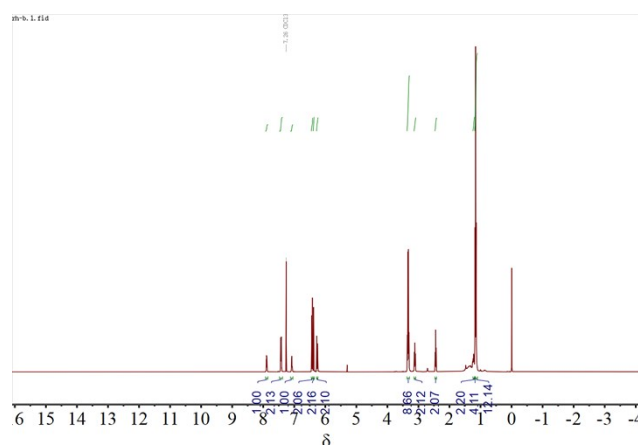

**Figure S1** <sup>1</sup>H NMR spectrum of compound **1** in CDCl<sub>3</sub>.

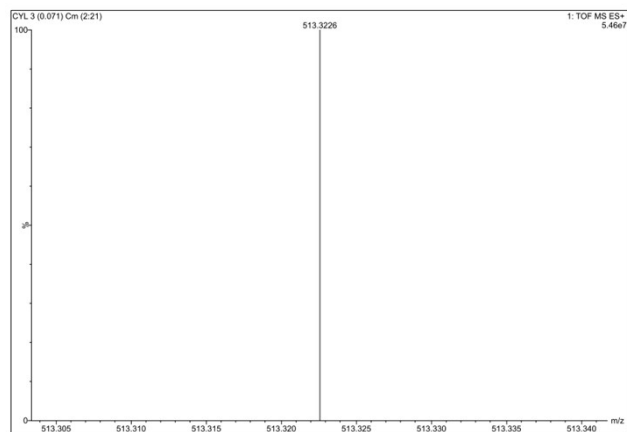

**Figure S2** HRMS (ESI) of compound **1**.

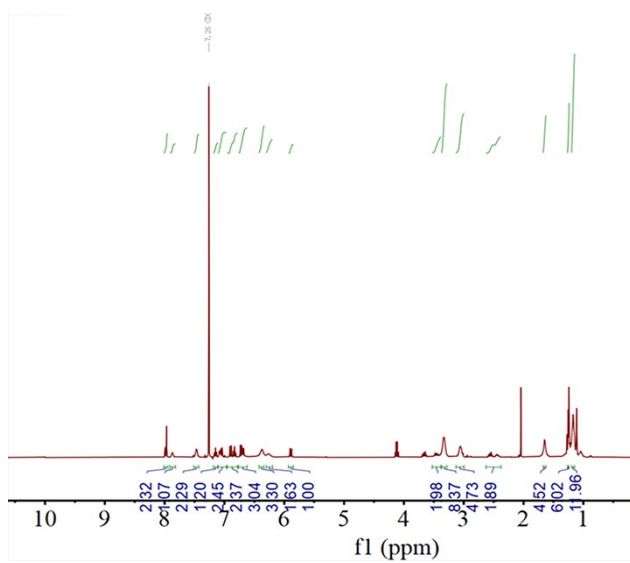

**Figure S3** <sup>1</sup>H NMR spectrum of compound **C** in CDCl<sub>3</sub>.

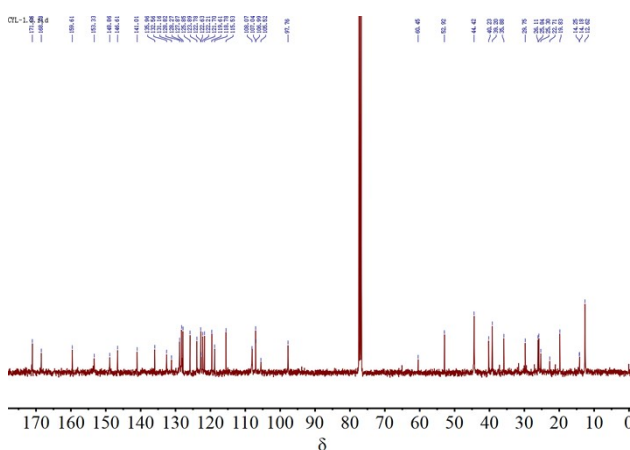

**Figure S4** <sup>13</sup>C NMR spectrum of compound **C** in CDCl<sub>3</sub>.

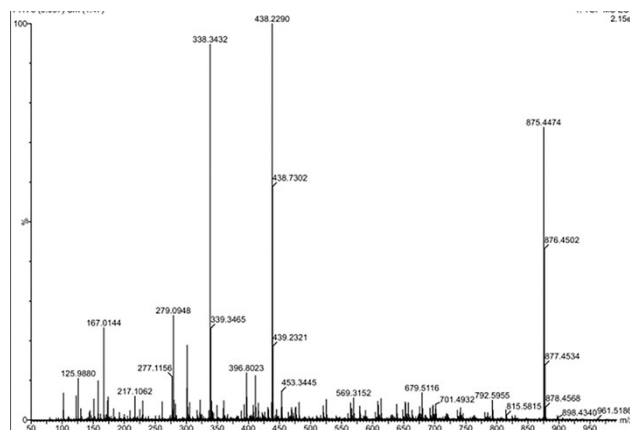

**Figure S5** HRMS (ESI) of compound C.

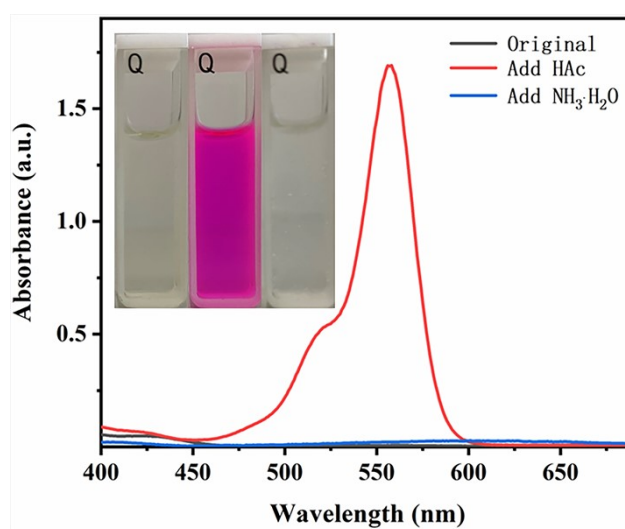

**Figure S6** The acidochromism reversibility of compound C.

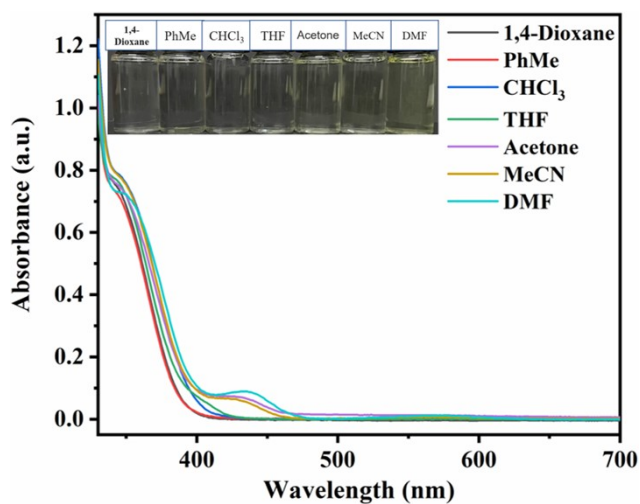

**Figure S7** Influence of different polar solvents on compound C.

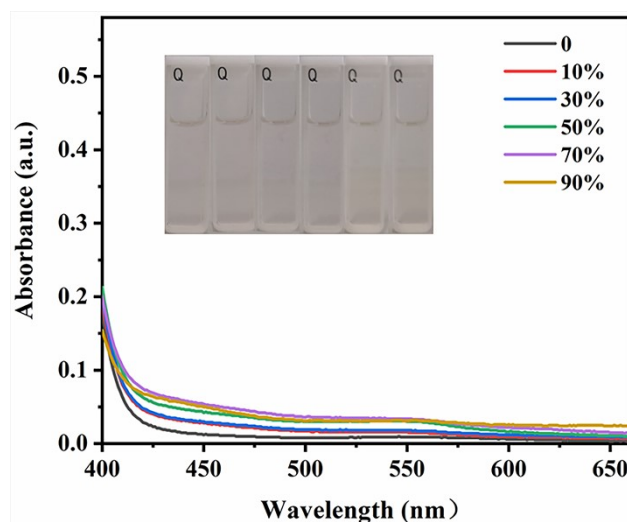

**Figure S8** UV-vis absorption spectra of SP-COOH solution ( $1 \times 10^{-4}$  M) with increasing HAc content (0 to 90%, by volume) (The illustrations are the colors under different volumes).

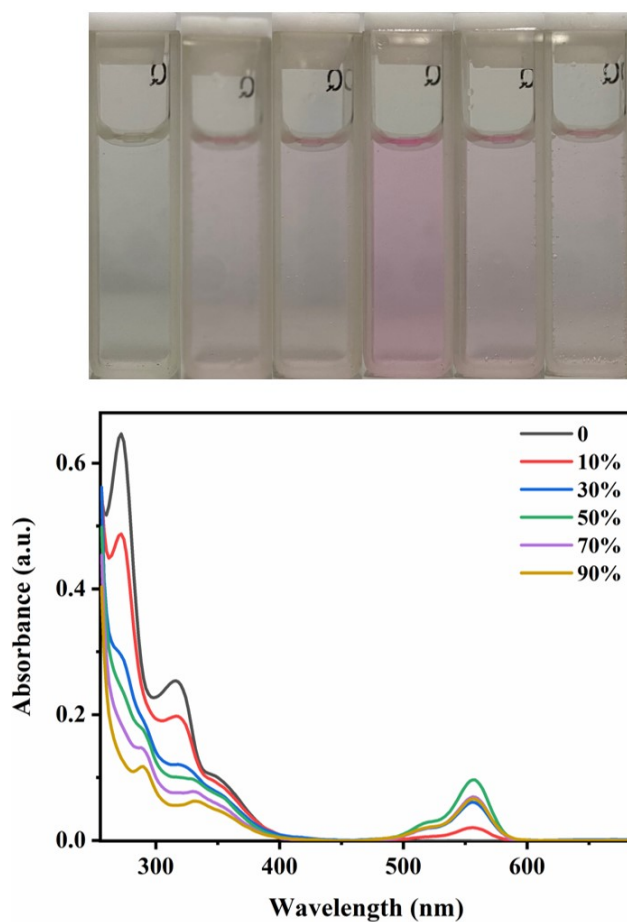

**Figure S9** Colour and UV-vis absorption spectra of physical mixing of **1** and **3** (n: n=1:1) in MeCN solution ( $1 \times 10^{-4}$  M) with increasing HAc content (0 to 90%, by

volume) at 3 min.

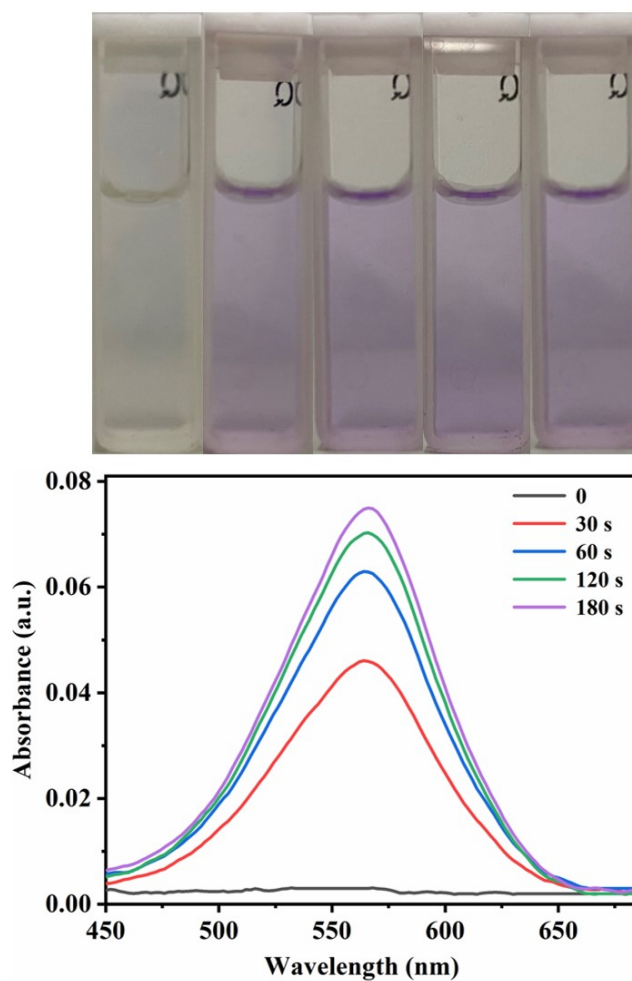

**Figure S10** The colour of physical mixing of **1** and **3** ( $n: n=1:1$ ) in MeCN solution ( $1 \times 10^{-4}$  M) and corresponding UV-vis absorption spectra with different UV irradiation times (0-180s).

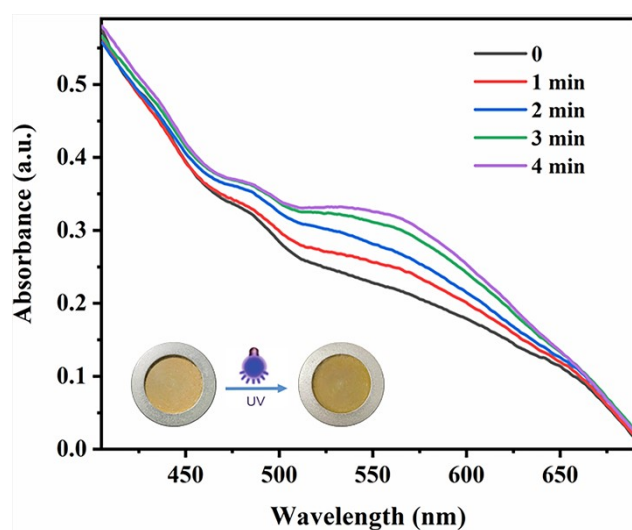

**Figure S11** UV-vis absorption spectra of compound **1** and **3** physical blending in the solid state (before and after UV light irradiation).

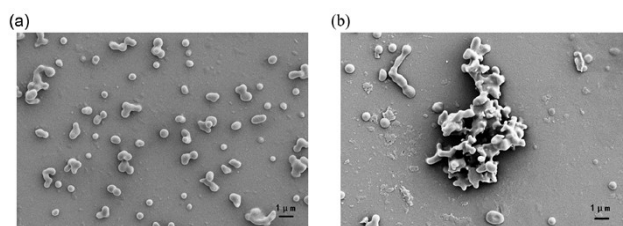

**Figure S12** SEM images of the compound C: (a) Before grinding (b) After grinding.

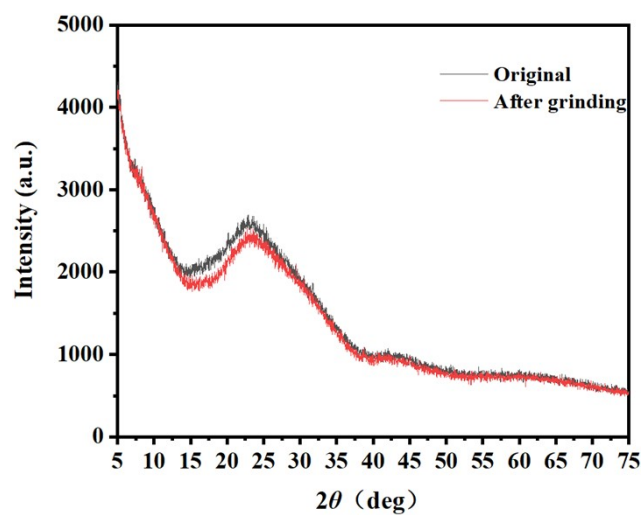

**Figure S13** PXRD pattern of the compound C powder before and after grinding.

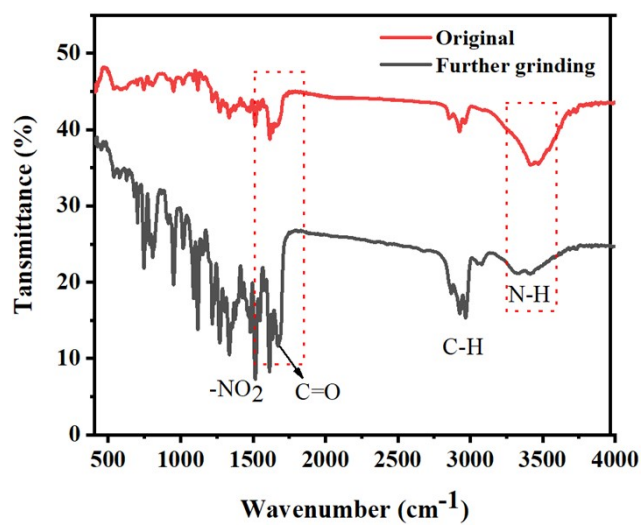

**Figure S14** FTIR comparison of compound C (Before and After grinding).



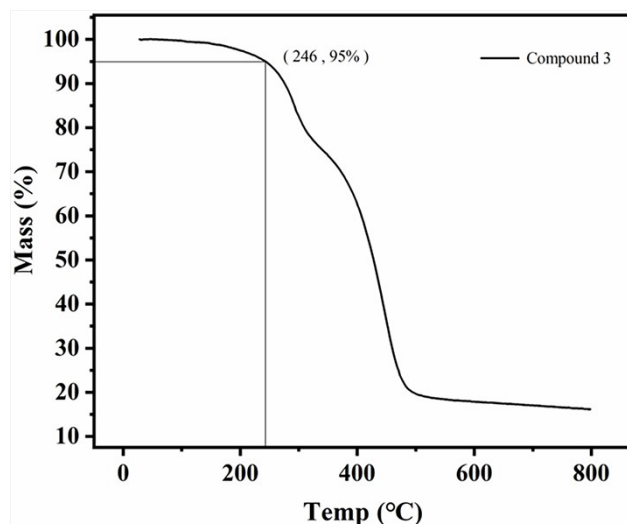

**Figure S15** Thermogravimetric analysis of compound C.

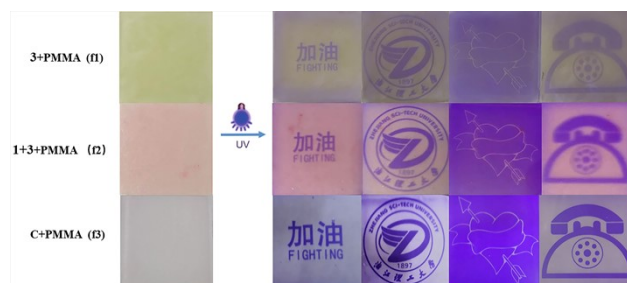

**Figure S16** Images obtained after UV light on PMMA film (f1, f2, f3).

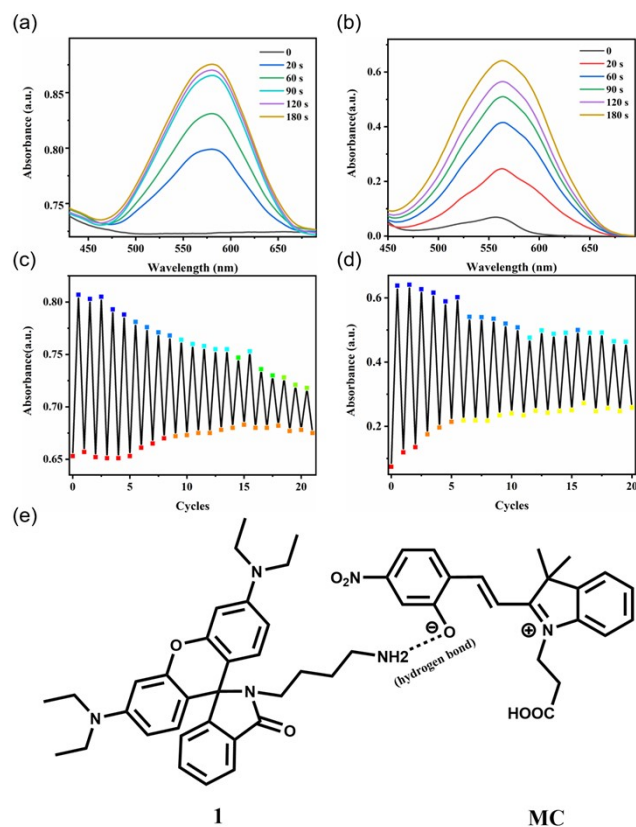

**Figure S17** (a) UV-vis absorption results before and after UV light irradiation of f1 (0-

180 s) and (c) photo-fatigue-resistant properties of f1 upon UV irradiation 120s and heating for 5 min. (b) UV-vis absorption results before and after UV light irradiation of f2 (0-180s) and (d) photo-fatigue-resistant properties of f2 upon UV irradiation 120s and heating for 10 min. (e) Schematic diagram of hydrogen bonding between MC form (compound 3 after UV light) and  $\text{-NH}_2$  in compound 1.

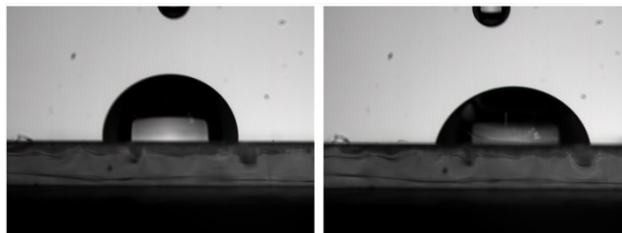

**Figure S18** The Change of the contact angle of the film containing only compound C before and after UV light irradiation (decreased from  $101.51^\circ$  to  $83.345^\circ$ ).
